# Supplementary material for: Directed Evolution of Phi Class Glutathione Transferases Involved in Multiple-Herbicide Resistance of Grass Weeds and Crops
Source: MDPI journal article supplement (doi:10.3390/ijms23137469), 2022-07-05
Supplement: s1 [file s1]

## SUPPLEMENTARY MATERIALS

**Table S1:** Primer sequences that were used in this study.

| Primer Sets                              |                | Nucleotide Sequence                            |
|------------------------------------------|----------------|------------------------------------------------|
| <b>pEXP5-CT/TOPO homologous overlaps</b> |                |                                                |
| <i>Am</i> GSTF                           | <b>Forward</b> | 5' GAAGGAGATACCCTTATGGCACCTGTAAAAGTCTTTGGT 3'  |
|                                          | <b>Reverse</b> | 5' GTGATGATGACCCTT-CGCTTTTGGCGGAACCATTGT 3'    |
| <i>Hv</i> GSTF                           | <b>Forward</b> | 5' GAAGGAGATACCCTTATGGCTCCGGTGAAGGTG 3'        |
|                                          | <b>Reverse</b> | 5' GTGATGATGACCCTTCGGCTTCTTGGGAACCATCTG 3'     |
| <i>Lr</i> GSTF                           | <b>Forward</b> | 5' GAAGGAGATACCCTTATGGCGCCAGTGAAAGTGTTTG 3'    |
|                                          | <b>Reverse</b> | 5' GTGATGATGACCCTTGGCTTTCGGTGGAACCATCGTTG 3'   |
| <i>Td</i> GSTF                           | <b>Forward</b> | 5'GAAGGAGATACCCTTATGGCGCCGGTGAAGGTGTTTCG 3'    |
|                                          | <b>Reverse</b> | 5'GTGATGATGACCCTTCGGCTTCTTGGGAACCATTTGC 3'     |
| <b>pETite C-His homologous overlaps</b>  |                |                                                |
| <i>Am</i> GSTF                           | <b>Forward</b> | 5' GAAGGAGATATACATATGGCACCTGTAAAAGTCTTTGGTC 3' |
|                                          | <b>Reverse</b> | 5' GTGATGGTGGTGATGATGCGCTTTTGGCGGAACCATTG 3'   |
| <i>Hv</i> GSTF                           | <b>Forward</b> | 5' GAAGGAGATATACATATGGCTCCGGTGAAGGTGTTC 3'     |
|                                          | <b>Reverse</b> | 5' GTGATGGTGGTGATGATGCGGCTTCTTGGGAACCATCTG 3'  |
| <i>Lr</i> GSTF                           | <b>Forward</b> | 5' GAAGGAGATATACATATGGCGCCAGTGAAAGTGTTTG 3'    |
|                                          | <b>Reverse</b> | 5' GTGATGGTGGTGATGATGGGCTTTCGGTGGAACCATCG 3'   |
| <i>Td</i> GSTF                           | <b>Forward</b> | 5' GAAGGAGATATACATATGGCGCCGGTGAAGGTGTTC 3'     |
|                                          | <b>Reverse</b> | 5' GTGATGGTGGTGATGATGCGGCTTCTTGGGAACCATTTG 3'  |
| <b>pETite C-His</b>                      |                |                                                |
| <b>Forward</b>                           |                | 5' CATCATCACCACCATCACTA 3'                     |
| <b>Reverse</b>                           |                | 5' CATATGTATATCTCCTTCTTATAGT 3'                |

**Table S2.** X-ray data collection and refinement statistics.

| <b>Data collection</b>                                             | <b>Sh101</b>                   | <b>Sh155</b>                  |
|--------------------------------------------------------------------|--------------------------------|-------------------------------|
| Beamline                                                           | P13 (EMBL, Hamburg)            | BioMAX (MAX IV, Lund)         |
| Wavelength (Å)                                                     | 0.9763                         | 0.9918                        |
| Resolution (Å)                                                     | 45.97-1.87 (1.93-1.87)         | 83.10-2.05 (2.11-2.05)        |
| Space group                                                        | <i>C</i> 2                     | <i>I</i> 2                    |
| Unit cell (Å)<br><i>a</i> , <i>b</i> , <i>c</i> (Å)<br>$\beta$ (°) | 92.01, 46.23, 110.25<br>112.29 | 46.48, 99.00, 153.21<br>93.73 |
| No. Molecules/asymmetric unit                                      | 2                              | 3                             |
| No. of observations                                                | 241684 (23609)                 | 212204 (16765)                |
| No. of unique reflections                                          | 36297 (3552)                   | 43427 (3415)                  |
| <i>I</i> /sigma( <i>I</i> )                                        | 10.9 (0.7)                     | 10.4 (1.0)                    |
| Completeness (%)                                                   | 99.8 (99.9)                    | 99.0 (99.0)                   |
| Multiplicity                                                       | 6.7 (6.6)                      | 4.9 (4.9)                     |
| Mosaicity (°)                                                      | 0.22                           | 0.10                          |
| <i>R</i> <sub>meas</sub>                                           | 0.087 (2.934)                  | 0.118 (2.255)                 |
| <i>CC</i> <sub>1/2</sub>                                           | 0.9999 (0.28)                  | 0.998 (0.456)                 |
| Wilson B factor (Å <sup>2</sup> )                                  | 47.9                           | 35.2                          |
| <b>Refinement</b>                                                  |                                |                               |
| No. of reflections used                                            | 36206                          | 43336                         |
| <i>R</i> <sub>cryst</sub> / <i>R</i> <sub>free</sub>               | 0.196/0.231                    | 0.216/0.252                   |
| RMSD in bonds (Å)                                                  | 0.008                          | 0.008                         |
| RMSD in angles (°)                                                 | 0.97                           | 0.92                          |
| No. of water molecules                                             | 101                            | 147                           |
| Average B-factor (Å <sup>2</sup> )                                 | 54.1                           | 52.5                          |
| Ramachandran favored/outliers (%)                                  | 95.4/1.53                      | 93.6/0.9                      |
| Clashscore                                                         | 4.53                           | 7.05                          |
| PDB id                                                             | 7ZA5                           | 7ZA4                          |

**Table S3.** GSTFs protein models created by the Swiss-Model.

|       | <i>Sequence<br/>Identity</i> | <i>Template</i> | <i>GMQE</i> | <i>QMEANDisCo<br/>Global</i> |
|-------|------------------------------|-----------------|-------------|------------------------------|
| sh12  | 92.24                        | 6riv.1.A        | 0.91        | $0.9 \pm 0.05$               |
| sh49  | 97.26                        | 6riv.1.A        | 0.92        | $0.9 \pm 0.05$               |
| sh147 | 91.78                        | 6riv.1.A        | 0.91        | $0.89 \pm 0.05$              |
| sh152 | 94.52                        | 6riv.1.A        | 0.91        | $0.9 \pm 0.05$               |
| sh168 | 94.52                        | 6riv.1.A        | 0.92        | $0.9 \pm 0.05$               |

## SUPPLEMENTARY FIGURES

|        | 1      | 2      | 3      | 4      | 5      | 6      | 7      | 8      | 9      | 10     | 11     |
|--------|--------|--------|--------|--------|--------|--------|--------|--------|--------|--------|--------|
| LrGSTF | 100.00 | 90.95  | 91.32  | 91.78  | 88.24  | 89.14  | 88.13  | 87.67  | 89.04  | 89.04  | 89.50  |
| AmGSTF | 90.95  | 100.00 | 97.26  | 94.52  | 87.33  | 88.24  | 92.24  | 91.78  | 94.52  | 94.98  | 92.24  |
| sh49   | 91.32  | 97.26  | 100.00 | 97.26  | 89.95  | 90.87  | 91.32  | 91.78  | 92.69  | 92.24  | 94.98  |
| sh168  | 91.78  | 94.52  | 97.26  | 100.00 | 91.78  | 89.95  | 93.15  | 93.61  | 91.32  | 91.32  | 94.06  |
| TdGSTF | 88.24  | 87.33  | 89.95  | 91.78  | 100.00 | 96.83  | 94.98  | 95.43  | 91.32  | 91.78  | 94.52  |
| HvGSTF | 89.14  | 88.24  | 90.87  | 89.95  | 96.83  | 100.00 | 91.78  | 92.24  | 91.78  | 93.15  | 95.89  |
| sh12   | 88.13  | 92.24  | 91.32  | 93.15  | 94.98  | 91.78  | 100.00 | 99.54  | 95.43  | 96.80  | 95.89  |
| sh147  | 87.67  | 91.78  | 91.78  | 93.61  | 95.43  | 92.24  | 99.54  | 100.00 | 94.98  | 96.35  | 96.35  |
| sh152  | 89.04  | 94.52  | 92.69  | 91.32  | 91.32  | 91.78  | 95.43  | 94.98  | 100.00 | 96.80  | 94.98  |
| sh101  | 89.04  | 94.98  | 92.24  | 91.32  | 91.78  | 93.15  | 96.80  | 96.35  | 96.80  | 100.00 | 97.26  |
| sh155  | 89.50  | 92.24  | 94.98  | 94.06  | 94.52  | 95.89  | 95.89  | 96.35  | 94.98  | 97.26  | 100.00 |

**Figure S1:** Sequence identity (%) between the parent and the enzyme variants that were studied in the present work.

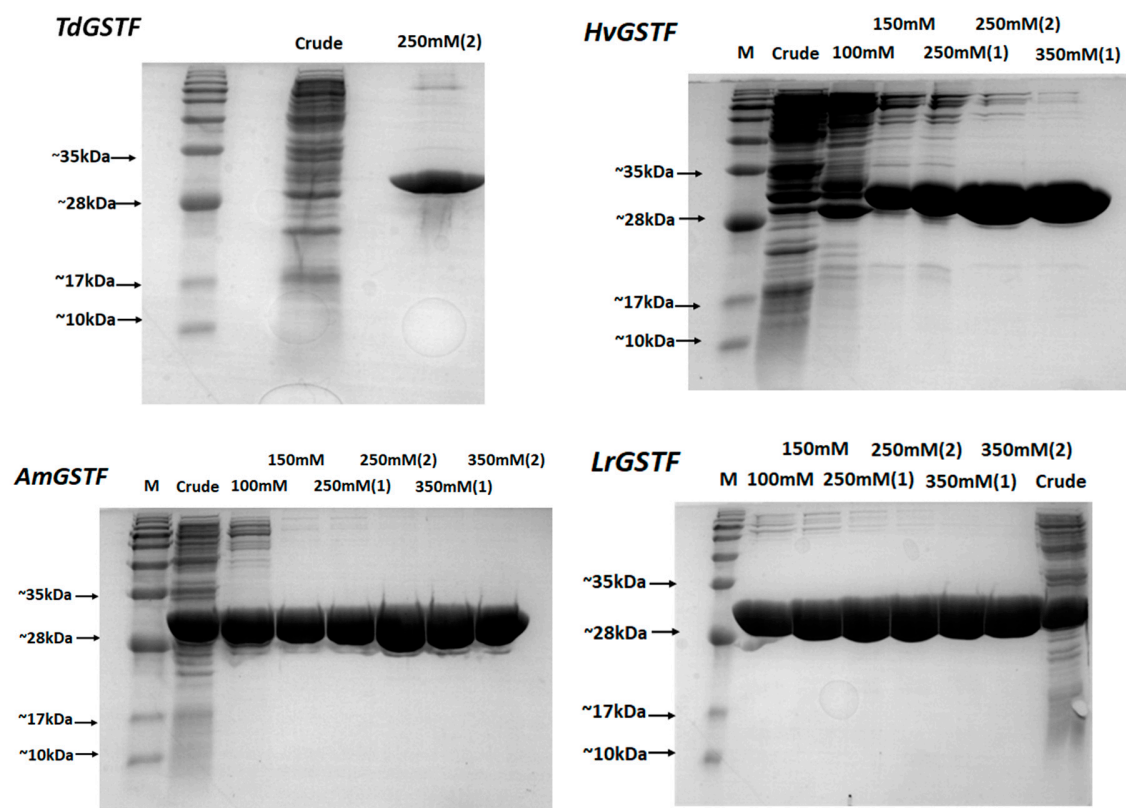

**Figure S2.** SDS-PAGE analysis of the purification of the parent GSTF enzymes by Ni-IDA-Sepharose affinity chromatography. “M” denotes the molecular marker, “Crude” the enzyme extract before purification. The concentration of imidazole (mM) that was used in each eluted fraction is showing above each gel.

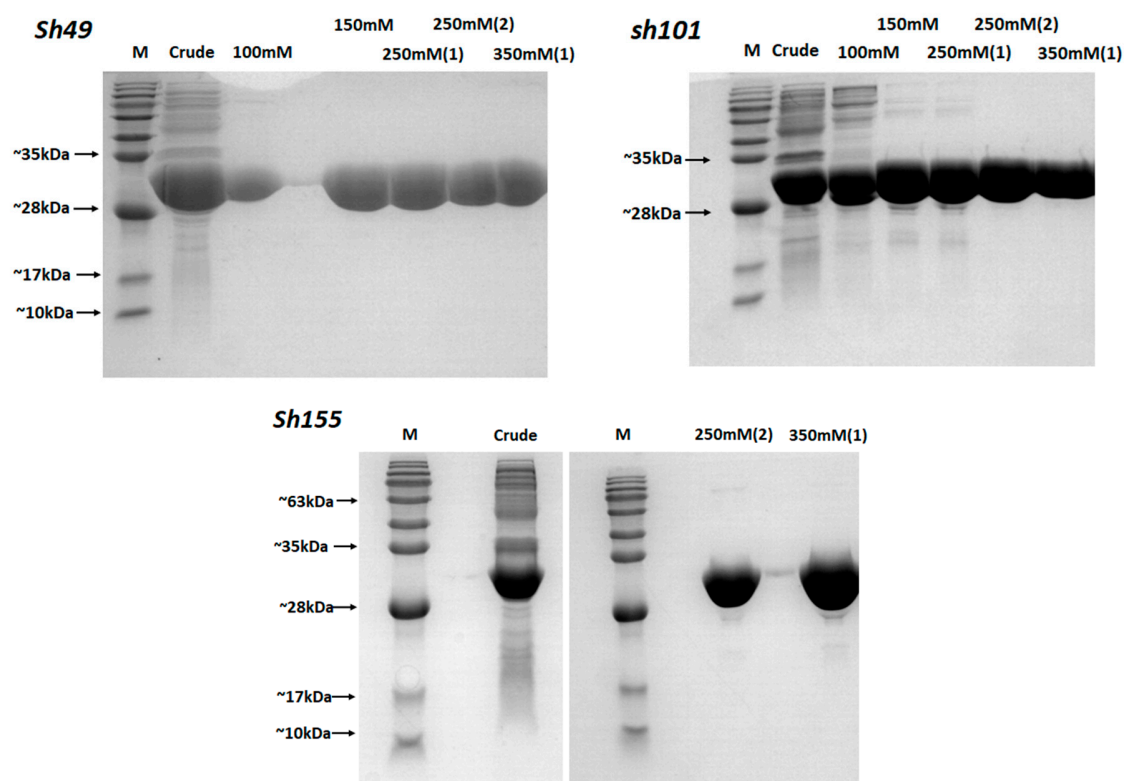

**Figure S3.** SDS-PAGE analysis of the purification of selected enzyme variants (sh49, sh101, sh155) by Ni-IDA-Sepharose affinity chromatography. “M” denotes the molecular marker, “Crude” the enzyme extract before purification. The concentration of imidazole (mM) that was used in each eluted fraction is showing above each gel.

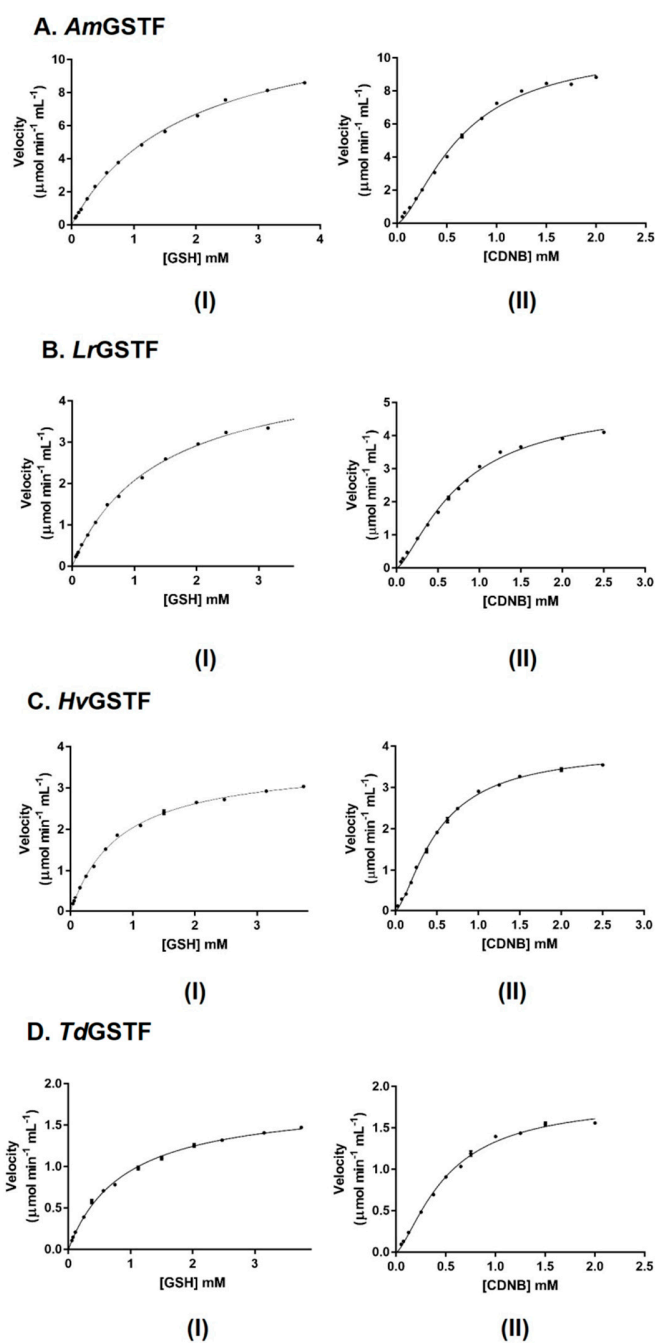

**Figure S4. Steady-state kinetics analysis of the parent GSTFs.** Steady-state kinetic analysis using GSH as a variable substrate and CDNB at a fixed concentration [A-D: (I)]. Steady-state kinetic analysis using the CDNB as a variable substrate and GSH at a fixed concentration [A-D: (II)]. The measurements were performed in triplicate and the data represent the mean  $\pm$  SD (N=3).

### A. Sh12

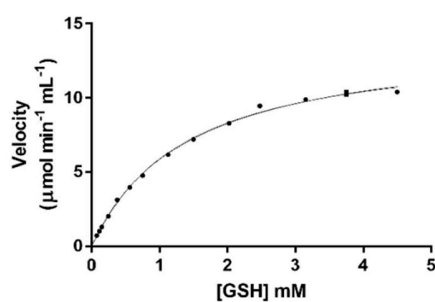

(I)

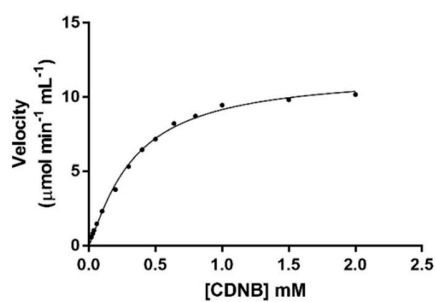

(II)

### B. Sh49

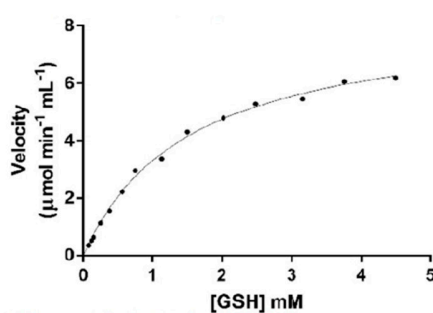

(I)

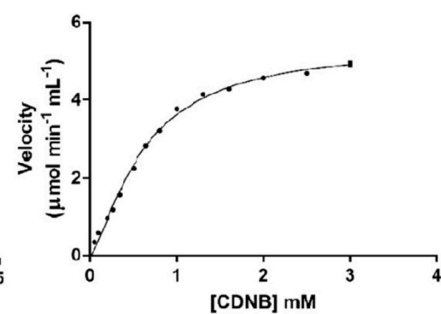

(II)

### C. Sh101

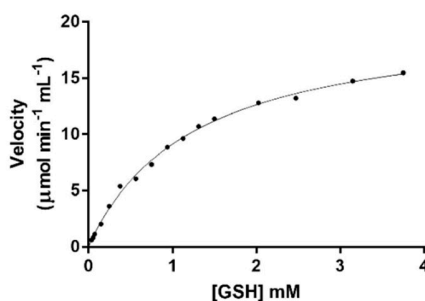

(I)

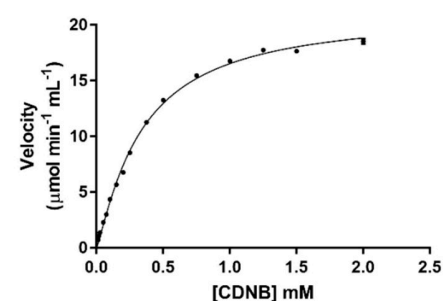

(II)

### D. Sh147

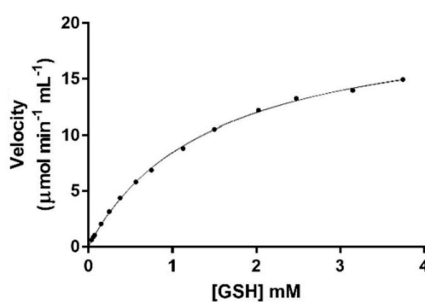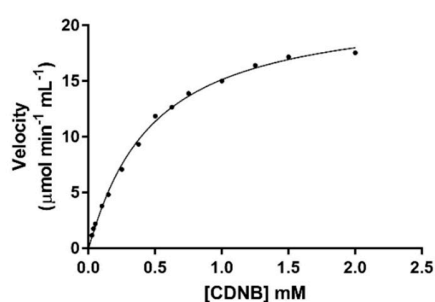



### E. Sh152

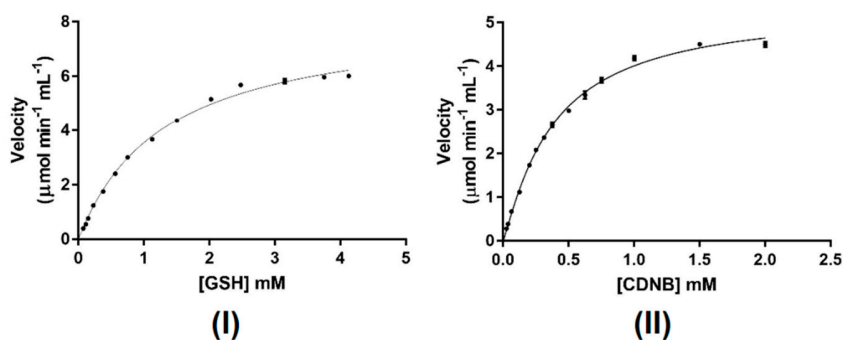

### F. Sh155

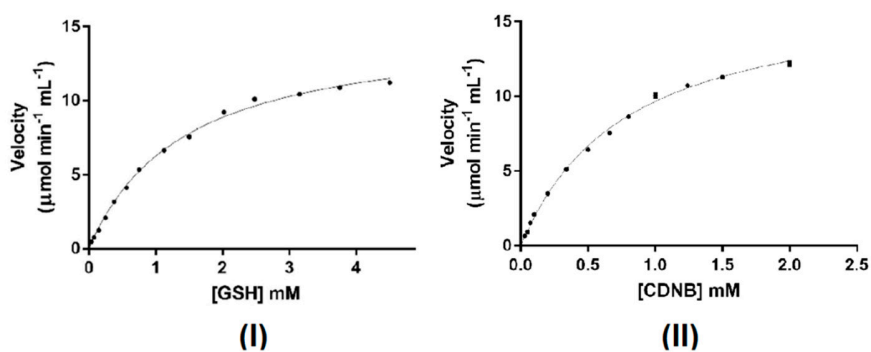

### G. Sh168

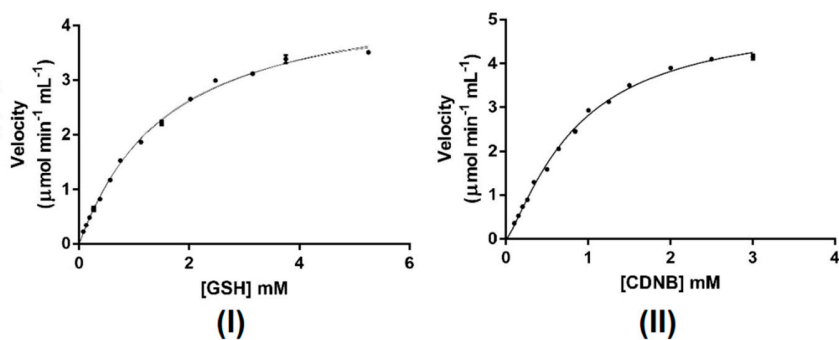

**Figure S5. Steady-state kinetics analysis of the DNA Shuffled enzyme variants.** Steady-state kinetic analysis using GSH as a variable substrate and CDNB at a fixed concentration [A-G: (I)]. Steady-state kinetic analysis using the CDNB as a variable substrate and GSH at a fixed concentration [A-G: (II)]. The measurements were carried in triplicate and the data represent the mean  $\pm$  SD (N=3).
